# Supplementary material for: Exploring the transcriptome of luxI− and ΔainS mutants and the impact of N-3-oxo-hexanoyl-L- and N-3-hydroxy-decanoyl-L-homoserine lactones on biofilm formation in Aliivibrio salmonicida
Source: PeerJ. 2019 Apr 30;7:e6845. doi: 10.7717/peerj.6845 (PMC6499059; doi:10.7717/peerj.6845)
Supplement: Supplemental Information 6 [file peerj-07-6845-s006.xlsx]

## Sheet: luxI HCD
VSAL ID	Product	FC	pvalue	Functional classes
VSAL_I3102s	srna	456.365	2.76448e-07	sRNA
VSAL_II0366	fimbrial protein, Flp/Fap pilin component	151.515	2.685e-33	Cell envelope
VSAL_II0252	hypothetical protein	90.7184	8.80589e-155	Cell envelope
VSAL_II0367	type IV leader peptidase	39.5346	7.92446e-39	Cell envelope
VSAL_II0134	hypothetical protein	38.7324	2.42714e-192	Cell envelope
VSAL_II0128	hypothetical protein, putative phage gene	35.6345	2.41009e-05	Extrachromosomal /foreign DNA
VSAL_I2712	dihydrolipoyl dehydrogenase (dihydrolipoamide dehydrogenase)	27.2209	1.13967e-05	Not classified (included putative assignments)
VSAL_II0362	hypothetical protein	25.3699	1.23551e-106	Unknown function, no known homologues
VSAL_II0135	putative cytochrome b561	19.0279	1.06564e-50	Energy metabolism, carbon
VSAL_II0370	putative lipoprotein	18.1165	4.11846e-24	Cell envelope
VSAL_II0986	hypothetical protein	17.0095	2.88145e-74	Unknown function, no known homologues
VSAL_I2713	hybrid peroxiredoxin (thioredoxin reductase)	16.3631	0.000172196	Biosynthesis of cofactors, carriers
VSAL_II0074	membrane protein	13.123	0.000976942	Cell envelope
VSAL_I2749	probable HTH-type transcriptional regulator LeuO	12.5979	1.29552e-45	Regulation
VSAL_II0363	putative response regulator	12.3426	1.495e-28	Regulation
VSAL_II0369	type II/III secretion system protein	10.8157	1.53696e-38	Extrachromosomal /foreign DNA
VSAL_II0947	hypothetical protein	10.4754	3.83583e-30	Unknown function, no known homologues
VSAL_II0372	type II/IV secretion system protein, ATP binding domain	10.26	3.50577e-33	Extrachromosomal /foreign DNA
VSAL_II0987	hypothetical protein	9.80746	5.09656e-48	Unknown function, no known homologues
VSAL_II0722	hypothetical protein	9.62329	9.87571e-33	Unknown function, no known homologues
VSAL_II0364	hypothetical protein	9.57992	2.23328e-12	Unknown function, no known homologues
VSAL_II0371	type II secretion system protein Z	9.57075	1.61514e-27	Extrachromosomal /foreign DNA
VSAL_II0312	hypothetical protein, putative anti-sigma factor antagonist	9.55207	4.70059e-26	Not classified (included putative assignments)
VSAL_I2064	conserved hypothetical protein	9.36949	0.00113402	Unknown function, no known homologues
VSAL_II0214	patatin-like phospholipase	9.34487	3.88049e-05	Fatty acid biosynthesis
VSAL_I2030	glutaredoxin 1	8.99768	1.38956e-15	Biosynthesis of cofactors, carriers
VSAL_I0902	chitinase A (fragment)	8.58136	2.16194e-31	Macromolecule metabolism
VSAL_I0132	putative lipoprotein	8.47507	3.68661e-21	Cell envelope
VSAL_I1475	hypothetical protein	8.41587	7.17109e-23	Cell envelope
VSAL_I1625	hypothetical protein	8.329	0.00318586	Unknown function, no known homologues
VSAL_II0368	putative Flp pilus assembly protein	8.22844	4.50769e-32	Cell envelope
VSAL_II0934	hypothetical protein	7.42977	7.36457e-17	Unknown function, no known homologues
VSAL_II0373	bacterial type II secretion system protein F	7.32176	2.97451e-33	Extrachromosomal /foreign DNA
VSAL_II0381	response regulator, histidine kinase	7.28356	7.48374e-25	Regulation
VSAL_I1627	membrane protein	7.2059	0.000110014	Cell envelope
VSAL_I1486	cold-shock protein	7.19681	6.12208e-19	Adaptation
VSAL_II0215	catalase	7.19533	0.000213899	Protection responses
VSAL_I0133	hypothetical protein	6.75445	2.80854e-18	Unknown function, no known homologues
VSAL_II0311	outer membrane protein, OmpA family	6.40907	3.45389e-15	Cell envelope
VSAL_I1603	putative exported protein	5.83196	0.0101155	Cell envelope
VSAL_II0988	hypothetical protein	5.78188	6.44735e-19	Unknown function, no known homologues
VSAL_II0687	glucose-6-phosphate 1-dehydrogenase	5.74748	1.70291e-29	Energy metabolism, carbon
VSAL_II0382	hypothetical protein	5.08244	1.92734e-13	Unknown function, no known homologues
VSAL_II0171	putative membrane protein	5.07479	4.30288e-27	Cell envelope
VSAL_II0685	6-phosphogluconate dehydrogenase	4.84644	1.65209e-22	Energy metabolism, carbon
VSAL_I1476	membrane protein	4.83987	1.99349e-11	Cell envelope
VSAL_I1604	putative exported protein (fragment)	4.71886	0.015865	Cell envelope
VSAL_I1056	carbonic anhydrase precursor	4.60708	8.56709e-14	Central intermediary metabolism
VSAL_II0686	6-phosphogluconolactonase	4.45794	3.59378e-23	Energy metabolism, carbon
VSAL_I1685	putative amidase	4.39015	1.06113e-18	Not classified (included putative assignments)
VSAL_II0102	hypothetical protein	4.25211	2.66129e-08	Central intermediary metabolism
VSAL_II0933	putative exported protein	4.20795	4.13051e-19	Cell envelope
VSAL_I1820	putative lipoprotein	4.15949	1.55338e-46	Cell envelope
VSAL_II0989	putative exported protein (fragment)	4.10705	3.8279e-15	Cell envelope
VSAL_I1819	outer membrane protein A	4.08671	1.90448e-21	Cell envelope
VSAL_II0170	methyl-accepting chemotaxis protein	3.92271	1.13941e-11	Cell processes
VSAL_I0134	L-2,4-diaminobutyrate decarboxylase	3.91153	1.30507e-05	Amino acid biosynthesis
VSAL_II0599	membrane protein	3.89044	1.46758e-11	Cell envelope
VSAL_II0300	hypothetical protein	3.8649	4.63447e-08	Unknown function, no known homologues
VSAL_I1629	glycosyl transferase, family 2 (pseudogene)	3.8345	0.000381753	Not classified (included putative assignments)
VSAL_I1526	membrane protein	3.74496	0.000560119	Cell envelope
VSAL_I4160s	null	3.72729	7.43286e-09	sRNA
VSAL_II0297	putative glycosyl transferase	3.63243	1.34381e-15	Macromolecule synthesis, modification
VSAL_II0932	cellulose synthase catalytic subunit	3.60011	8.42732e-21	Cell envelope
VSAL_I1687	aspartate aminotransferase	3.57457	1.96918e-10	Amino acid biosynthesis
VSAL_I1626	MltA-interacting protein MipA	3.53773	0.00138754	Cell envelope
VSAL_I2124	hypothetical protein	3.49737	2.92623e-06	Unknown function, no known homologues
VSAL_II0310	polysaccharide biosynthesis/export protein	3.47953	4.60149e-12	Macromolecule synthesis, modification
VSAL_II0935	hypothetical protein	3.44806	2.81208e-18	Unknown function, no known homologues
VSAL_I0025	putative exported protein	3.44275	1.48692e-20	Cell envelope
VSAL_II0931	membrane protein (fragment)	3.42829	3.86822e-10	Cell envelope
VSAL_I2547	conserved hypothetical protein	3.33449	0.0368409	Unknown function, no known homologues
VSAL_II0304	putative glycosyl transferase	3.30754	5.27995e-08	Macromolecule synthesis, modification
VSAL_I0514	transposase (pseudogene)	3.28253	3.9364e-12	Extrachromosomal /foreign DNA
VSAL_I4118s	srna	3.19605	4.32816e-11	sRNA
VSAL_I0135	siderophore biosynthetis protein	3.17647	3.14555e-05	Biosynthesis of cofactors, carriers
VSAL_I0903	transposase	3.12605	4.04113e-09	Extrachromosomal /foreign DNA
VSAL_II0721	PTS system permease for N-acetylglucosamine and glucose	3.07199	1.49912e-07	Transport/binding proteins
VSAL_II0172	hypothetical protein	3.04292	5.33148e-08	Unknown function, no known homologues
VSAL_I1628	putative radical SAM superfamily protein	2.96883	0.0055914	Not classified (included putative assignments)
VSAL_II1062	membrane protein	2.93437	5.52399e-11	Cell envelope
VSAL_I0460	colanic biosynthesis UDP-glucose lipid carrier transferase (pseudogene)	2.93236	9.61945e-13	Macromolecule synthesis, modification
VSAL_II0303	putative glycosyl transferase	2.91176	3.04328e-08	Macromolecule synthesis, modification
VSAL_I2588	iron(III) ABC transporter, periplasmic iron-compound-binding protein	2.90949	6.58032e-10	Transport/binding proteins
VSAL_I4109s	srna	2.87012	8.69503e-07	sRNA
VSAL_I1686	phosphoribosylglycinamide formyltransferase 2	2.85923	0.000169729	Nucleotide biosynthesis
VSAL_I1982	putative DNA transformation protein TfoX	2.83712	9.49943e-11	Not classified (included putative assignments)
VSAL_I4145s	null	2.76965	4.56011e-08	sRNA
VSAL_I1677	putative membrane protein	2.75665	0.000482156	Cell envelope
VSAL_II0050	N,N'-diacetylchitobiase precursor (chitobiase)	2.7493	3.27142e-11	Macromolecule metabolism
VSAL_I4031s	srna	2.71767	9.17599e-05	sRNA
VSAL_I1018	hypothetical protein, putative phage gene	2.642	0.0141762	Extrachromosomal /foreign DNA
VSAL_II0189	transposase (fragment)	2.62332	3.21154e-11	Extrachromosomal /foreign DNA
VSAL_II0512	putative exported protein	2.61329	1.32213e-11	Cell envelope
VSAL_I1682	hypothetical protein (fragment)	2.60331	0.0193918	Unknown function, no known homologues
VSAL_II2036s	srna	2.59408	0.00739304	sRNA
VSAL_II0511	superoxide dismutase [Cu-Zn] precursor	2.57919	1.0191e-12	Protection responses
VSAL_I2441	hypothetical protein	2.57334	5.05561e-08	Protection responses
VSAL_I1036	probable rRNA transcription initiatior protein, putative phage gene	2.53335	0.0446886	Extrachromosomal /foreign DNA
VSAL_I4105s	srna	2.51987	0.00155804	sRNA
VSAL_II0946	integral membrane protein	2.51884	3.44112e-10	Cell envelope
VSAL_II0296	putative transmembrane glycosyl transferase	2.49287	3.34857e-09	Macromolecule synthesis, modification
VSAL_I0884	putative exported protein	2.49178	1.99277e-07	Cell envelope
VSAL_I1751	TonB protein (pseudogene)	2.46716	0.0236405	Transport/binding proteins
VSAL_I1547	hypothetical protein	2.45959	7.84358e-06	Unknown function, no known homologues
VSAL_I1681	inner membrane protein, LrgA family	2.45859	0.00285275	Cell envelope
VSAL_I4095s	srna	2.44134	0.00973033	sRNA
VSAL_II0688	putative membrane protein	2.42113	0.000846869	Cell envelope
VSAL_I3163s	null	2.42098	0.00127936	sRNA
VSAL_II0663	integral membrane protein, putative transmembrane transporter	2.41201	1.46173e-07	Cell envelope
VSAL_I4144s	srna	2.40018	5.21212e-08	sRNA
VSAL_I1667	putative exported protein	2.39952	0.000482295	Cell envelope
VSAL_II0717	putative membrane protein	2.38893	0.000132068	Cell envelope
VSAL_I1300	putative membrane protein	2.361	0.000108941	Cell envelope
VSAL_I1269	hypothetical protein	2.35956	2.17809e-05	Unknown function, no known homologues
VSAL_I1666	hypothetical protein	2.35867	0.00184758	Unknown function, no known homologues
VSAL_I1029	phage terminase, endonuclease subunit	2.34928	0.011515	Extrachromosomal /foreign DNA
VSAL_I4077s	srna	2.32547	6.29023e-06	sRNA
VSAL_I1673	DNA repair protein	2.30384	0.00128398	Macromolecule synthesis, modification
VSAL_II0992	transposase (fragment)	2.29481	1.33696e-12	Extrachromosomal /foreign DNA
VSAL_I0026	hypothetical protein	2.28563	9.14476e-12	Unknown function, no known homologues
VSAL_I1035	probable tail tube protein	2.27313	0.0194732	Extrachromosomal /foreign DNA
VSAL_II0138	hypothetical protein	2.2536	6.27581e-13	Unknown function, no known homologues
VSAL_I1465	hypothetical protein	2.24811	0.0234166	Unknown function, no known homologues
VSAL_II0302	putative polysaccharide biosynthesis protein	2.24084	8.24834e-07	Macromolecule synthesis, modification
VSAL_I1644	hypothetical protein, putative phage gene	2.23328	3.4632e-06	Extrachromosomal /foreign DNA
VSAL_I0284	5-carboxymethyl-2-hydroxymuconate isomerase	2.22411	1.06598e-10	Degradation of small molecules
VSAL_I1647	putative membrane protein, putative phage gene	2.21662	0.000510771	Extrachromosomal /foreign DNA
VSAL_I1624	enhancing lycopene biosynthesis protein 2	2.21653	0.00151667	Biosynthesis of cofactors, carriers
VSAL_I2963	valine--pyruvate aminotransferase (alanine--valine transaminase)	2.20975	3.86246e-07	Amino acid biosynthesis
VSAL_I1060	putative exported protein	2.20212	8.98009e-10	Cell envelope
VSAL_I1325	proton glutamate symport protein	2.19948	5.89763e-06	Transport/binding proteins
VSAL_I1909	membrane protein	2.19386	0.000303912	Cell envelope
VSAL_I2989	putative beta-N-acetylhexosaminidase	2.18728	3.55235e-08	Not classified (included putative assignments)
VSAL_I1668	small heat shock protein IbpA (16 kDa heat shock protein A)	2.18588	0.00132325	Adaptation
VSAL_II0937	membrane protein	2.18431	4.89008e-10	Cell envelope
VSAL_I2858	probable CsgAB operon transcriptional regulatory protein	2.184	3.26537e-05	Regulation
VSAL_II0098	transposase	2.17959	5.1687e-10	Extrachromosomal /foreign DNA
VSAL_I2950	putative signaling protein (pseudogene)	2.17456	1.64151e-07	Not classified (included putative assignments)
VSAL_II0374	bacterial type II secretion system protein F	2.17349	7.26124e-09	Extrachromosomal /foreign DNA
VSAL_I1716	transposase (pseudogene)	2.1595	4.90044e-10	Extrachromosomal /foreign DNA
VSAL_I1678	Hypothetical protein	2.15555	0.0119003	Unknown function, no known homologues
VSAL_II0150	ferrichrome transport ATP-binding protein FhuC	2.1521	0.00214349	Transport/binding proteins
VSAL_II0846	putative acetyltransferase	2.15178	1.12331e-07	Not classified (included putative assignments)
VSAL_I1927	hypothetical protein, putative phage gene (fragment)	2.1492	0.0380868	Extrachromosomal /foreign DNA
VSAL_II0257	transposase (pseudogene)	2.14881	2.92438e-11	Extrachromosomal /foreign DNA
pVSAL320_11	putative DNA-damage-inducible protein	2.13619	1.76236e-05	Not classified (included putative assignments)
VSAL_II0298	putative membrane protein	2.13271	2.01584e-07	Cell envelope
VSAL_I0115	transposase	2.12549	1.11972e-11	Extrachromosomal /foreign DNA
VSAL_II0928	transposase	2.1251	3.30321e-11	Extrachromosomal /foreign DNA
VSAL_I1258	transposase (pseudogene)	2.12223	6.8404e-11	Extrachromosomal /foreign DNA
VSAL_I1061	transposase	2.12047	6.33534e-11	Extrachromosomal /foreign DNA
VSAL_I1747	transposase	2.12033	9.16932e-11	Extrachromosomal /foreign DNA
VSAL_I1672	transposase	2.12009	1.68214e-10	Extrachromosomal /foreign DNA
VSAL_II1089	hypothetical protein (fragment)	2.11988	1.04363e-05	Unknown function, no known homologues
VSAL_I1656	transposase	2.11664	4.9342e-10	Extrachromosomal /foreign DNA
VSAL_I2250	transposase	2.11553	7.98059e-10	Extrachromosomal /foreign DNA
VSAL_I2611	transposase	2.11338	2.98096e-12	Extrachromosomal /foreign DNA
VSAL_I0872	hypothetical protein	2.11329	4.28348e-06	Unknown function, no known homologues
VSAL_II0985	membrane transport protein, putative auxin efflux carrier	2.1108	6.01368e-07	Transport/binding proteins
VSAL_II0044	transposase (fragment)	2.10791	2.30563e-05	Extrachromosomal /foreign DNA
VSAL_I2707	transposase	2.10119	4.65529e-11	Extrachromosomal /foreign DNA
VSAL_I1780	transposase	2.09944	9.05501e-11	Extrachromosomal /foreign DNA
VSAL_II0973	transposase	2.09795	1.50421e-09	Extrachromosomal /foreign DNA
VSAL_I2953	transposase	2.09764	2.06925e-10	Extrachromosomal /foreign DNA
VSAL_I0066	transposase	2.09732	0.000605326	Extrachromosomal /foreign DNA
VSAL_I1998	cytochrome c-type protein NrfB precursor	2.09674	0.000232479	Energy metabolism, carbon
VSAL_II0069	transposase	2.09534	1.88876e-09	Extrachromosomal /foreign DNA
VSAL_II0175	transposase	2.09317	4.66775e-11	Extrachromosomal /foreign DNA
VSAL_II0313	putative exported protein	2.09279	7.43572e-09	Cell envelope
VSAL_II0243	transposase	2.08807	3.69574e-10	Extrachromosomal /foreign DNA
VSAL_I2753	transposase	2.0842	3.8098e-10	Extrachromosomal /foreign DNA
VSAL_I2263	hypothetical protein, putative phage gene (fragment)	2.08395	4.65985e-05	Extrachromosomal /foreign DNA
VSAL_I1316	transposase (pseudogene)	2.08361	2.52282e-09	Extrachromosomal /foreign DNA
VSAL_I1442	transposase	2.08185	5.9732e-10	Extrachromosomal /foreign DNA
VSAL_II0768	transposase (pseudogene)	2.08085	7.20304e-10	Extrachromosomal /foreign DNA
VSAL_I2943	transposase	2.07621	1.44343e-10	Extrachromosomal /foreign DNA
VSAL_II1018	transposase	2.07614	1.0083e-09	Extrachromosomal /foreign DNA
VSAL_II0068	hypothetical protein	2.07183	0.014027	Unknown function, no known homologues
VSAL_II0270	transposase	2.06931	4.29473e-09	Extrachromosomal /foreign DNA
VSAL_I2462	transposase (pseudogene)	2.06929	4.52971e-10	Extrachromosomal /foreign DNA
VSAL_II0219	transposase	2.06527	5.20728e-10	Extrachromosomal /foreign DNA
VSAL_II0991	transposase	2.06331	1.91848e-10	Extrachromosomal /foreign DNA
VSAL_I1241	transposase (pseudogene)	2.06168	2.03725e-10	Extrachromosomal /foreign DNA
VSAL_I0971	alanine racemase (pseudogene)	2.06137	0.0116461	Cell envelope
VSAL_II0197	transcriptional activator protein, response regulator	2.05816	8.48894e-05	Regulation
VSAL_II0229	transposase	2.05693	4.40849e-10	Extrachromosomal /foreign DNA
VSAL_I2163	transposase	2.0561	2.75679e-10	Extrachromosomal /foreign DNA
VSAL_I2192	hypothetical protein	2.05499	0.000683138	Cell envelope
VSAL_I0811	transposase	2.05458	6.10099e-10	Extrachromosomal /foreign DNA
VSAL_I2114	transposase	2.05431	3.50301e-09	Extrachromosomal /foreign DNA
VSAL_I0764	transposase (pseudogene)	2.05314	8.97277e-10	Extrachromosomal /foreign DNA
VSAL_II0876	transposase	2.05069	3.49213e-10	Extrachromosomal /foreign DNA
VSAL_I2320	transposase (pseudogene)	2.0488	6.14305e-09	Extrachromosomal /foreign DNA
VSAL_I4189s	srna	2.04795	4.68227e-06	sRNA
VSAL_II0335	transposase	2.04791	4.2509e-10	Extrachromosomal /foreign DNA
VSAL_I2882	transposase	2.04681	3.69758e-10	Extrachromosomal /foreign DNA
VSAL_I0857	anaerobic C4-dicarboxylate transporter DcuC	2.04637	2.15504e-05	Transport/binding proteins
VSAL_I2257	ferrous iron transport protein FeoA	2.04492	0.000233796	Transport/binding proteins
VSAL_I0318	transposase (pseudogene)	2.04373	3.56177e-09	Extrachromosomal /foreign DNA
VSAL_II0299	putative glycosyl transferases	2.04359	0.00325426	Macromolecule synthesis, modification
VSAL_II0080	transposase	2.04052	5.07825e-10	Extrachromosomal /foreign DNA
VSAL_II1007	transposase	2.03939	2.60948e-09	Extrachromosomal /foreign DNA
VSAL_I1270	ribonucleotide reductase	2.03848	0.000129643	Macromolecule synthesis, modification
VSAL_I1268	transposase (pseudogene)	2.03799	5.64967e-10	Extrachromosomal /foreign DNA
VSAL_II1090	transposase	2.03743	2.86777e-10	Extrachromosomal /foreign DNA
VSAL_I0281	transposase (pseudogene)	2.03587	3.4234e-09	Extrachromosomal /foreign DNA
VSAL_I2486	transposase	2.02968	6.9756e-10	Extrachromosomal /foreign DNA
VSAL_I1107	transposase	2.02693	6.34462e-08	Extrachromosomal /foreign DNA
VSAL_II0009	transposase (pseudogene)	2.02521	3.79357e-09	Extrachromosomal /foreign DNA
VSAL_I1576	transposase	2.02424	7.55243e-10	Extrachromosomal /foreign DNA
VSAL_II0833	transposase	2.02295	4.20084e-10	Extrachromosomal /foreign DNA
VSAL_I1608	HTH-type transcriptional regulator GalR	2.02134	0.000842525	Regulation
VSAL_I1811	transposase (pseudogene)	2.02013	8.43713e-10	Extrachromosomal /foreign DNA
VSAL_I0291	transposase	2.01949	1.39454e-09	Extrachromosomal /foreign DNA
VSAL_I2264	transposase	2.01926	4.09837e-08	Extrachromosomal /foreign DNA
VSAL_II1050	transposase	2.01747	1.61232e-09	Extrachromosomal /foreign DNA
VSAL_I0144	transposase	2.012	5.66312e-10	Extrachromosomal /foreign DNA
VSAL_I0883	putative exported protein	2.01092	2.64148e-06	Cell envelope
VSAL_I1945	transposase (pseudogene)	2.00883	3.61527e-09	Extrachromosomal /foreign DNA
VSAL_II0470	transposase	2.00698	1.12263e-08	Extrachromosomal /foreign DNA
VSAL_II0046	transposase	2.0025	6.4486e-10	Extrachromosomal /foreign DNA
VSAL_I1771	hypothetical protein (pseudogene)	-2.02565	1.08511e-08	Unknown function, no known homologues
VSAL_II0445	bacterial extracellular solute-binding protein	-2.03027	0.000171133	Transport/binding proteins
VSAL_II0147	membrane associated GGDEF protein	-2.03805	2.11318e-07	Cell envelope
VSAL_I2620	transposase (pseudogene)	-2.04174	4.60176e-07	Extrachromosomal /foreign DNA
VSAL_I1238	exported serine protease (pseudogene)	-2.04762	0.000309728	Macromolecule metabolism
pVSAL840_67	hypothetical protein	-2.05074	7.06394e-09	Unknown function, no known homologues
VSAL_I1590	quinolone resistance determinant QnrC	-2.05976	1.15524e-06	Protection responses
VSAL_I4107s	srna	-2.06339	0.00102223	sRNA
VSAL_I2170	putative MgtC/SapB transporter	-2.06384	0.000438209	Transport/binding proteins
VSAL_I1271	putative response regulator	-2.06842	0.00245271	Regulation
VSAL_II0955	putative multidrug transport protein (pseudogene)	-2.06867	0.00849877	Protection responses
VSAL_I2156	2,4-dienoyl-CoA reductase [NADPH]	-2.06883	8.08099e-10	Fatty acid biosynthesis
VSAL_I1589	hypothetical protein	-2.07106	5.84934e-06	Unknown function, no known homologues
VSAL_I4092s	srna	-2.07704	1.02257e-05	sRNA
VSAL_I1343	L-serine dehydratase 1	-2.10186	9.66363e-09	Degradation of small molecules
VSAL_II0346	putative nuclease	-2.11966	8.39976e-05	Macromolecule metabolism
VSAL_II0104	putative 6-phosphogluconate dehydrogenase	-2.1242	0.000128284	Not classified (included putative assignments)
VSAL_I1344	serine transporter	-2.13084	5.79567e-06	Transport/binding proteins
VSAL_II1020	membrane protein	-2.13323	1.8632e-05	Cell envelope
VSAL_I0588	putative exported protein	-2.14009	3.3486e-09	Cell envelope
pVSAL840_25	antirestriction protein ArdC	-2.16781	0.000462972	Extrachromosomal /foreign DNA
VSAL_II0428	integral membrane protein, putative two-component signal transducer	-2.17746	4.7877e-06	Regulation
VSAL_I1504	maltose O-acetyltransferase	-2.18286	5.42282e-06	Degradation of small molecules
VSAL_II0969	putative exported protein	-2.18378	0.00305173	Cell envelope
VSAL_I2773	putative membrane protein	-2.18532	0.0264769	Cell envelope
VSAL_I0476	type IV pilus, mannose-sensitive hemagglutinin A	-2.19016	4.20791e-06	Cell envelope
VSAL_II0424	putative fatty acid desaturase	-2.19101	0.00545782	Fatty acid biosynthesis
VSAL_I1713	glycerol-3-phosphate transporter	-2.19348	1.67574e-07	Transport/binding proteins
VSAL_I1851	putative membrane protein	-2.19429	3.91279e-11	Cell envelope
VSAL_I0401	hypothetical protein	-2.19463	3.25104e-05	Unknown function, no known homologues
pVSAL840_28	DNA-binding protein HU-alpha	-2.19508	5.68665e-05	Macromolecule synthesis, modification
VSAL_II0446	binding-protein-dependent transport system inner membrane component	-2.20218	2.45529e-06	Transport/binding proteins
VSAL_I0620	thymidine phosphorylase	-2.21088	1.49405e-05	Central intermediary metabolism
VSAL_II1013	putative heme binding protein	-2.23386	1.33531e-07	Not classified (included putative assignments)
VSAL_I1357	secreted protein Hcp-2 (haemolysin co-regulated protein)	-2.24103	0.0242491	Transport/binding proteins
VSAL_I2283	chemotaxis protein CheW	-2.25445	2.86288e-13	Cell processes
VSAL_II0731	putative membrane protein	-2.25651	1.90145e-09	Cell envelope
VSAL_II0166	hypothetical protein	-2.27827	9.31894e-09	Unknown function, no known homologues
VSAL_I2349	putative exported protein	-2.28439	0.00444704	Cell envelope
VSAL_II0920	maltose transport system permease protein MalG	-2.28645	6.7397e-06	Transport/binding proteins
VSAL_II0059	putative type I toxin secretion system, membrane transport protein	-2.30581	3.30042e-07	Transport/binding proteins
VSAL_II0239	glycogen synthase	-2.30627	4.30802e-08	Macromolecule synthesis, modification
VSAL_I1907	putative ion channel	-2.31367	9.91113e-06	Transport/binding proteins
VSAL_II0223	hypothetical protein	-2.34687	0.00560713	Unknown function, no known homologues
VSAL_I1498	putative membrane protein	-2.35093	0.00108187	Cell envelope
VSAL_I2282	putative membrane protein	-2.36351	7.89179e-15	Cell envelope
VSAL_I1198	probable membrane permease	-2.3734	6.56396e-08	Transport/binding proteins
VSAL_I1699	outer membrane protein, OmpA-like	-2.41012	5.05801e-09	Cell envelope
VSAL_I2128	putative exported protein	-2.41187	0.0212812	Cell envelope
VSAL_I2343	polar flagellar FlgN, putative chaperone	-2.41217	5.24521e-08	Cell processes
VSAL_I2206	putative sporulation protein	-2.41272	1.40818e-06	Cell division
VSAL_II1012	response regulator, histidine kinase	-2.41378	3.82265e-09	Regulation
VSAL_I2304	polar flagellar assembly protein FliJ	-2.43472	5.05574e-07	Cell processes
VSAL_I4178s	srna	-2.44168	0.00398	sRNA
VSAL_I4081s	srna	-2.45031	0.00225389	sRNA
VSAL_II0394	cytochrome c551 peroxidase	-2.4776	1.06061e-08	Energy metabolism, carbon
VSAL_II0060	putative type I toxin secretion system, ATP-binding protein	-2.49023	7.67546e-10	Transport/binding proteins
VSAL_I1808	hypothetical protein	-2.51944	2.15274e-16	Unknown function, no known homologues
VSAL_I2207	conserved hypothetical protein	-2.54005	5.87626e-06	Unknown function, no known homologues
VSAL_I1449	hypothetical protein	-2.59891	1.30683e-06	Unknown function, no known homologues
VSAL_II0052	response regulator protein	-2.62971	2.53806e-15	Regulation
VSAL_I1451	putative cytoplasmic chaperone TorD	-2.65523	0.00280073	Cell processes
VSAL_I0761	conserved hypothetical protein	-2.67176	3.07295e-07	Unknown function, no known homologues
VSAL_II0232	putative alpha amylase	-2.67958	5.57759e-10	Macromolecule metabolism
VSAL_I1450	putative ferredoxin	-2.69976	3.2344e-05	Energy metabolism, carbon
VSAL_II0246	nitrite reductase [NAD(P)H] small subunit	-2.70426	0.00998543	Energy metabolism, carbon
VSAL_I1977	membrane associated GGDEF protein	-2.70758	3.23275e-10	Cell envelope
VSAL_I0824	putative exported protein	-2.72222	0.00037412	Cell envelope
VSAL_II0057	putative membrane associated response regulator	-2.74025	6.48776e-11	Regulation
VSAL_II0062	membrane protein	-2.75518	1.47455e-07	Cell envelope
VSAL_II0238	glucose-1-phosphate adenylyltransferase	-2.76155	2.03265e-08	Macromolecule synthesis, modification
VSAL_I1906	membrane protein	-2.76303	3.04608e-06	Cell envelope
VSAL_I2340	chemotaxis protein methyltransferase CheV	-2.76589	8.32824e-16	Cell processes
VSAL_II0315	putative response regulator	-2.78771	3.08475e-10	Regulation
VSAL_II0712	methyl-accepting chemotaxis citrate transducer	-2.80516	1.6846e-15	Cell processes
VSAL_II0644	putative membrane protein	-2.8077	2.09575e-08	Cell envelope
VSAL_I2056	general L-amino acid ABC transporter permease protein	-2.92256	5.40431e-10	Transport/binding proteins
VSAL_I2342	negative regulator of flagellin synthesis FlgM, anti-sigma28 factor	-2.93061	5.95666e-10	Regulation
VSAL_I1905	membrane protein	-2.94469	1.74372e-08	Cell envelope
VSAL_II0058	putative type I toxin secretion system, outer membrane efflux protein	-2.948	2.17783e-10	Transport/binding proteins
VSAL_I1904	secretion protein, HlyD family	-2.97584	1.40576e-16	Transport/binding proteins
VSAL_II0101	peptidase	-2.98345	5.99086e-14	Macromolecule metabolism
VSAL_II0061	exported glycosyl hydrolase, family 16	-2.98899	1.08598e-09	Macromolecule metabolism
VSAL_I1599	putative polysaccharide deacetylase	-2.9908	0.000366386	Not classified (included putative assignments)
VSAL_II0317	putative membrane protein	-3.0079	1.21517e-09	Cell envelope
VSAL_I2208	putative PrkA serine protein kinase	-3.03153	3.16959e-09	Not classified (included putative assignments)
VSAL_II0028	putative membrane protein	-3.06666	1.05957e-10	Cell envelope
VSAL_II1095	putative membrane protein	-3.06666	1.05957e-10	Cell envelope
VSAL_I2295	polar flagellar assembly protein FlhB	-3.08276	5.4745e-14	Cell processes
VSAL_II0055	hypothetical protein	-3.08301	2.10265e-16	Unknown function, no known homologues
VSAL_I2054	general L-amino acid transport ATP-binding subunit	-3.13375	1.11133e-09	Transport/binding proteins
VSAL_II0231	chemotaxis protein CheV	-3.13413	6.05708e-17	Cell processes
VSAL_I2061	hypothetical protein	-3.20371	8.99811e-07	Unknown function, no known homologues
VSAL_I2344	putative lipoprotein	-3.27492	9.61491e-10	Cell envelope
VSAL_I1832	hypothetical protein (fragment)	-3.28876	1.32193e-17	Unknown function, no known homologues
VSAL_II2019s	srna	-3.3007	0.000937933	sRNA
VSAL_I0755	membrane protein	-3.30487	6.80271e-22	Cell envelope
VSAL_II0065	membrane protein	-3.32052	4.31018e-08	Cell envelope
VSAL_II2038s	srna	-3.32723	9.87358e-07	sRNA
VSAL_II0718	membrane protein	-3.3673	6.37366e-13	Cell envelope
VSAL_I4059s	srna	-3.36766	1.72272e-13	sRNA
VSAL_II0067	hypothetical protein	-3.38234	2.36208e-05	Unknown function, no known homologues
VSAL_I2055	general L-amino acid ABC transporter permease protein	-3.46081	1.28615e-14	Transport/binding proteins
VSAL_I2339	chemotaxis protein methyltransferase CheR	-3.47263	3.53902e-20	Cell processes
VSAL_II0968	putative exported protein	-3.48091	0.00793327	Cell envelope
VSAL_II0316	response regulator, histidine kinase	-3.52152	1.37027e-21	Regulation
VSAL_I2397	putative exported protein	-3.53643	1.80927e-30	Cell envelope
VSAL_II0331	putative exported protein	-3.54036	3.67349e-11	Cell envelope
VSAL_I2438	isocitrate lyase	-3.54519	6.09198e-05	Central intermediary metabolism
VSAL_I1863	sodium-type flagellar protein MotY precursor	-3.58551	5.05057e-12	Cell processes
VSAL_II0587	outer membrane protein, OmpA family	-3.60277	2.55367e-22	Cell envelope
VSAL_II0056	putative type I secretion protein, HlyD family	-3.67642	8.16614e-18	Transport/binding proteins
VSAL_II0318	putative exported protein	-3.71839	2.15247e-11	Cell envelope
VSAL_I2299	polar flagellar assembly protein FliO	-3.73964	1.91855e-14	Cell processes
VSAL_II0064	putative type I secretion protein, HlyD family	-3.79525	9.23154e-26	Transport/binding proteins
VSAL_I2300	polar flagellar switch protein FliN	-3.80066	9.96836e-18	Cell processes
VSAL_II0066	membrane protein	-3.80728	5.9165e-30	Cell envelope
pVSAL840_26	hypothetical protein	-3.84239	4.97626e-14	Unknown function, no known homologues
VSAL_I2439	malate synthase A	-3.85766	0.0115862	Central intermediary metabolism
VSAL_II1023	hypothetical protein	-3.91404	3.58248e-05	Unknown function, no known homologues
VSAL_I2130	methyl-accepting chemotaxis protein	-3.91849	3.25158e-26	Cell processes
VSAL_I2698	hypothetical protein (pseudogene)	-3.99633	3.88036e-22	Unknown function, no known homologues
VSAL_II0020	hemolysin-type calcium-binding protein	-4.00685	3.07283e-31	Not classified (included putative assignments)
VSAL_II0053	membrane associated response regulator, histidine kinase	-4.06804	6.81523e-30	Regulation
VSAL_II2008s	srna	-4.15354	3.93935e-16	sRNA
VSAL_I4098s	srna	-4.15652	2.66944e-29	sRNA
VSAL_I1856	hypothetical protein	-4.16435	2.71941e-30	Unknown function, no known homologues
VSAL_I1317	carbon starvation protein (pseudogene)	-4.18059	5.68076e-10	Adaptation
VSAL_II0325	putative exported protein	-4.19503	3.28812e-23	Cell envelope
VSAL_I2302	polar flagellar protein FliL	-4.22868	7.83168e-19	Cell processes
VSAL_II0324	putative lipoprotein	-4.25072	8.64822e-26	Cell envelope
VSAL_I2305	polar flagellum-specific ATP synthase FliI	-4.33371	3.83584e-16	Cell processes
VSAL_II0063	putative type I secretion system, ATP-binding protein	-4.46151	1.02128e-23	Transport/binding proteins
VSAL_I2284	cheW-like protein	-4.49653	1.14499e-32	Not classified (included putative assignments)
VSAL_I2346	putative exported protein	-4.54067	5.3487e-18	Cell envelope
VSAL_II0329	putative response regulator	-4.74365	1.7163e-21	Regulation
VSAL_I1428	conserved hypothetical protein	-4.81542	1.25634e-17	Unknown function, no known homologues
VSAL_II0158	transposase	-4.83606	0.000594602	Extrachromosomal /foreign DNA
VSAL_II0333	transposase	-4.91965	8.40716e-28	Extrachromosomal /foreign DNA
VSAL_II0319	RNA polymerase sigma factor	-5.08218	9.1462e-28	Regulation
VSAL_I2301	polar flagellar switch protein FliM (flagellar motor switch protein FliM)	-5.09597	4.2377e-31	Cell processes
VSAL_I2057	general L-amino acid-binding periplasmic protein precursor	-5.14431	1.88814e-30	Transport/binding proteins
VSAL_II0326	hypothetical protein	-5.21896	2.98273e-22	Unknown function, no known homologues
VSAL_II0332	putative hemolysin-type calcium-binding protein (fragment)	-5.29153	4.75654e-29	Not classified (included putative assignments)
VSAL_I2298	polar flagellar assembly protein FliP	-5.52011	4.47284e-22	Cell processes
VSAL_II0323	putative lipoprotein	-5.67381	5.43708e-24	Cell envelope
VSAL_II0328	putative anti-sigma F factor antagonist	-5.86907	3.71096e-17	Not classified (included putative assignments)
VSAL_I2286	chemotaxis response regulator protein-glutamate methylesterase	-6.014	3.61014e-25	Cell processes
VSAL_I2297	polar flagellar assembly protein FliR	-6.08003	5.57166e-20	Cell processes
VSAL_I2291	flagellar biosynthesis protein FlhG (flagellar number regulator)	-6.15129	4.97336e-45	Regulation
VSAL_I2290	RNA polymerase sigma factor for flagellar regulon FliA	-6.16113	2.48173e-47	Regulation
VSAL_I2289	chemotaxis protein CheY	-6.36519	2.90879e-34	Cell processes
VSAL_I2287	chemotaxis protein CheA	-6.48663	1.88629e-36	Cell processes
VSAL_II0322	putative membrane protein	-6.51793	7.9386e-33	Cell envelope
VSAL_II0321	putative glycosyl transferase	-6.53693	2.37884e-32	Cell envelope
VSAL_I2285	putative chromosome segregation protein	-6.57502	9.26224e-43	Cell processes
VSAL_II0320	putative membrane associated signaling protein	-6.68996	6.19324e-24	Regulation
VSAL_I1995	phospholipase A1 precursor	-6.73727	2.90171e-36	Central intermediary metabolism
VSAL_II0054	hypothetical protein	-6.98966	2.77451e-41	Unknown function, no known homologues
VSAL_II2048s	srna	-7.12477	4.12774e-21	sRNA
VSAL_II0327	putative nucleotidyl transferase	-7.20428	6.7398e-27	Central intermediary metabolism
VSAL_I2288	chemotaxis protein CheZ	-7.46514	1.67901e-46	Cell processes
VSAL_II0959	probable flavin reductase LuxG	-8.20987	1.43361e-22	Energy metabolism, carbon
VSAL_I2296	polar flagellar assembly protein FliR	-8.23318	4.51317e-24	Cell processes
VSAL_I1857	hypothetical protein	-8.47286	2.43041e-25	Unknown function, no known homologues
VSAL_I2292	flagellar biosynthesis protein FlhF	-8.47852	1.4371e-57	Cell processes
VSAL_I2293	polar flagellar assembly protein FlhA	-8.52131	2.11368e-37	Cell processes
VSAL_II0647	hypothetical protein (pseudogene)	-8.89807	4.34776e-57	Unknown function, no known homologues
VSAL_II0330	hypothetical protein	-9.41819	3.87667e-19	Unknown function, no known homologues
VSAL_I2303	polar flagellar hook-length control protein FliK	-9.43676	4.46386e-34	Cell processes
VSAL_I2771	sodium-type polar flagellar protein MotX	-9.86568	9.44239e-36	Cell processes
VSAL_II0785	putative exported protein	-10.2244	7.31127e-21	Cell envelope
VSAL_II1022	methyl-accepting chemotaxis protein	-10.9958	1.82382e-20	Cell processes
VSAL_II0960	long-chain-fatty-acid ligase LuxE	-11.5071	8.98905e-28	Regulation
VSAL_I1427	hypothetical protein	-11.5526	1.44302e-47	Unknown function, no known homologues
VSAL_II0963	acyl transferase LuxD	-11.5681	2.17005e-35	Regulation
VSAL_I2332	flagellar L-ring protein 1 precursor (basal body L-ring protein 1)	-12.2051	8.45236e-50	Cell processes
VSAL_II0528	hemolysin secretion protein	-13.4197	6.00022e-41	Extrachromosomal /foreign DNA
VSAL_I2328	flagellar hook-associated protein type 3 FlgL	-14.5009	6.28532e-43	Cell processes
VSAL_I0937	sodium-driven polar flagellar protein MotB	-15.6485	4.83562e-36	Cell processes
VSAL_I2345	putative exported protein	-15.7894	3.73537e-33	Cell envelope
VSAL_I2443	putative exported protein	-15.8763	2.7362e-80	Cell envelope
VSAL_I2331	flagellar P-ring protein 2 precursor (basal body P-ring protein 2)	-15.9318	1.99398e-65	Cell processes
VSAL_I2517	hypothetical protein	-16.8493	2.84e-64	Cell processes
VSAL_I2333	flagellar basal-body rod protein FlgG (distal rod protein)	-17.8839	1.18175e-58	Cell processes
VSAL_I1951	methyl-accepting chemotaxis protein	-18.1831	9.80181e-43	Cell processes
VSAL_II0962	alkanal monooxygenase alpha chain LuxA (bacterial luciferas alpha chain)	-22.3233	1.26805e-50	Regulation
VSAL_I2193	methyl-accepting chemotaxis protein	-23.0112	1.0873e-45	Cell processes
VSAL_I2444	accessory colonization factor precursor AcfA	-23.5137	3.69342e-80	Extrachromosomal /foreign DNA
VSAL_I4140s	srna	-23.7412	2.42348e-24	sRNA
VSAL_I0936	sodium-driven polar flagellar protein MotA	-25.0857	2.89795e-62	Cell processes
VSAL_I2330	peptidoglycan hydrolase FlgJ	-26.0343	1.00342e-54	Cell processes
VSAL_II0961	alkanal monooxygenase beta chain LuxB (bacterial luciferase beta chain)	-26.1131	2.83704e-40	Regulation
VSAL_I2306	polar flagellar assembly protein FliH	-29.568	9.59646e-53	Cell processes
VSAL_I0799	methyl-accepting chemotaxis protein	-30.2052	1.9116e-107	Cell processes
VSAL_I2334	flagellar basal-body rod protein FlgF	-33.7788	8.14041e-53	Cell processes
VSAL_II0821	putative exported protein	-35.7604	7.71066e-54	Cell envelope
VSAL_I2329	hypothetical protein	-45.6701	1.35849e-100	Cell processes
VSAL_I2335	flagellar hook protein FlgE	-46.7036	7.69854e-91	Cell processes
VSAL_I2336	flagellar basal-body rod protein FlgD	-50.0311	1.01423e-118	Cell processes
VSAL_II0964	acyl-CoA reductase LuxC	-51.443	2.46298e-63	Regulation
VSAL_II0957	autoinducer synthesis protein LuxI	-76.646	1.1309e-303	Regulation
VSAL_I2337	flagellar basal-body rod protein FlgC	-123.523	2.99774e-142	Cell processes
VSAL_I2338	flagellar basal-body rod protein FlgB	-161.938	3.11096e-147	Cell processes
VSAL_I0014	transposase	-288.929	0.0364932	Extrachromosomal /foreign DNA
VSAL_II0829	transposase	-361.707	0.0296659	Extrachromosomal /foreign DNA
VSAL_I2325	flagellin subunit B	-474.977	2.78595e-54	Cell processes
VSAL_I2319	hypothetical protein	-530.273	6.51909e-15	Cell processes
VSAL_I2310	sigma-54 dependent response regulator	-551.614	2.44338e-08	Regulation
VSAL_I2311	histidine kinase	-732.387	1.02509e-28	Regulation
VSAL_I2326	putative exported protein	-856.26	1.09187e-15	Cell envelope
VSAL_II0454	transposase	-992.341	1.83226e-15	Extrachromosomal /foreign DNA
VSAL_I2313	polar flagellar protein FliS (polar flagellar protein FlaJ)	-1055.08	5.03591e-23	Cell processes
VSAL_I2309	flagellar hook-basal body complex protein FliE	-1095.51	3.19942e-17	Cell processes
VSAL_I2327	hypothetical protein	-1125.34	5.98509e-07	Cell processes
VSAL_I2317	hypothetical protein	-1129.07	4.39919e-06	Cell processes
VSAL_I2314	polar flagellar protein FlaI	-1720.25	4.70719e-19	Cell processes
VSAL_I2315	polar flagellar hook-associated protein 2 (HAP2) (flagellar cap protein)	-2303.85	4.97205e-28	Cell processes
VSAL_I4139s	srna	-2506.87	7.96896e-29	sRNA
VSAL_I2316	polar flagellar protein FlaG (pseudogene)	-2577.98	6.9979e-21	Cell processes
VSAL_I2308	polar flagellar M-ring protein FliF (pseudogene)	-3050.22	3.85043e-30	Cell processes
VSAL_I2318	hypothetical protein	-3661.38	3.39516e-82	Cell processes
VSAL_I2307	polar flagellar motor switch protein FliG	-4806.71	1.53729e-24	Cell processes
VSAL_I2312	sigma 54 dependent transcription regulator	-12952.9	2.78303e-30	Regulation
